# Supplementary material
Source: publisher figshare collection journal article supplement (https://tandf.figshare.com/ndownloader/files/17618642)
Supplement: Supplementary file 1 [file 17618642]

**Supplementary Information**

S-1 (a) FTIR spectrum of **1** (b) FTIR spectra of DAHO ligand and **2**

|  |  |
| --- | --- |
| (a) | (b) |

S-2 UV-Vis spectrum of **1** obtained in aqueous solution (a-b); UV-Vis spectrum of **2** obtained in aqueous solution (c-d) and in DMSO solution (e-f)

| 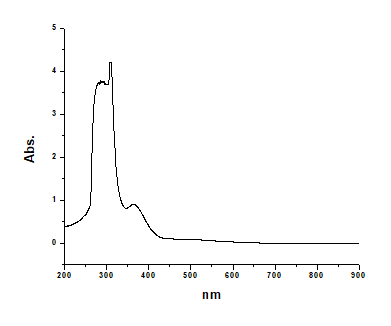 | 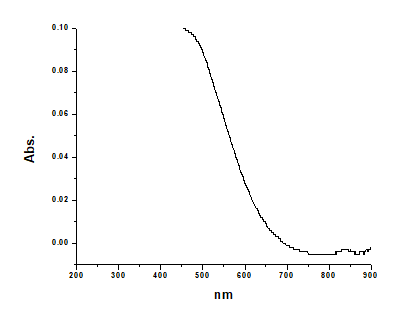 |
| --- | --- |
| (a) | (b) |
| 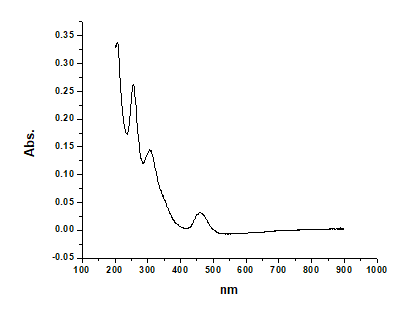 | 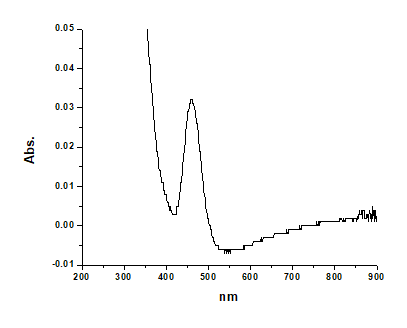 |
| © | (d) |
|  |  |
| (e) | (f) |

S-3 (a) TGA and DTA curves of **1** (b) TGA and DTA curves of **2**

|  |  |
| --- | --- |
| (a) | (b) |
|  |  |
| (c) | (d) |

S-4 EPR spectra of 2 (a) at LNT obtained from solid powder and (b) at RT from MeOH solution

|  |  |
| --- | --- |
| (a) | (b) |
